# Supplementary material
Source: PubMed Central journal article supplement (PMC2825477)
Supplement: supp_M109.068155_jbc.M109.068155-1.pdf [file supp_M109.068155_jbc.M109.068155-1.pdf]

**Table S1. Primer Sequences Used to Generate Plasmid Constructs**

| Proteins   | Plasmid               | Primer Sequence                                                   |                                                                         |
|------------|-----------------------|-------------------------------------------------------------------|-------------------------------------------------------------------------|
|            |                       | Forward (5'→3')                                                   | Reverse (5'→3')                                                         |
| TgADF WT   | pET16b+/TgADF         | GGG AAT CCA TAT GGC GTC CGG AAT GGG TGT TG                        | GAC GGA TCC TTA CGC GAG GGG TGC GAG GTC GC                              |
| TgADF G66K | pET16b+/TgADF G66K    | GCC GAT TCG GCG TGT ACG ACT GCA AGA ACA AGA TCC AGT TCG TTC TTT G | CAA AGA ACG AAC TGG ATC TTG TTC TTG CAG TCG ATC ACG CCG AAT CCG C       |
| TgADF G66R | pET16b+/TgADF G66R    | CGG CGT GTA CGA CTG CCG CAA CAA GAT CCA GTT C                     | GAA CTG GAT CTT GTT GCG GCA GTC GAT CAC GCC G                           |
| TgADF-t    | pET16b+/TgADF-SpCOF-t | GGG AAT CCA TAT GGC GTC CGG AAT GGG TGT TG                        | GAG GAT CCT ACT TAC GAG TAA CCT TCT CAA GAA CCG CGA GGG GTG CGA GGT CGG |
| TgADF S3A  | pET16b+/TgADF S3A     | GAA GGT CGT CAT ATG GCG GCC GGA ATG GGT GTT GAC G                 | CGT CAA CAC CCA TTC CGG CCG CCA TAT GAC GAC CTT C                       |
| TgADF S3C  | pET16b+/TgADF S3C     | GAA GGT CGT CAT ATG GCG TGC GGA ATG GGT GTT GAC G                 | CGT CAA CAC CCA TTC CGC ACG CCA TAT GAC GAC CTT C                       |
| TgADF S3E  | pET16b+/TgADF S3E     | GAA GGT CGT CAT ATG GCG GAG GGA ATG GGT GTT GAC GAG               | CTC GTC AAC ACC CAT TCC CTC CGC CAT ATG ACG ACC TTC                     |
